# Supplementary material for: Functionalized Mesoporous Silica as Doxorubicin Carriers and Cytotoxicity Boosters
Source: Nanomaterials (Basel). 2022 May 26;12(11):1823. doi: 10.3390/nano12111823 (PMC9182127; doi:10.3390/nano12111823)
Supplement: Supplementary file 1 [file nanomaterials-12-01823-s001.zip › nanomaterials-1704874-supplementary.pdf]

# Functionalized Mesoporous Silica as Doxorubicin Carriers and Cytotoxicity Boosters

**Carmen Racles <sup>1</sup>, Mirela-Fernanda Zaltariov <sup>1,\*</sup>, Dragos Peptanariu <sup>2</sup>, Tudor Vasiliu <sup>2</sup> and Maria Cazacu <sup>1</sup>**

<sup>1</sup> Department of Inorganic Polymers, "Petru Poni" Institute of Macromolecular Chemistry, 41A Aleea Gr. Ghica Voda, 700487 Iasi, Romania; radesc@icmpp.ro (C.R.); mcazacu@icmpp.ro (M.C.)

<sup>2</sup> Centre of Advanced Research in Bionanoconjugates and Biopolymers, "Petru Poni" Institute of Macromolecular Chemistry, 41A Aleea Gr. Ghica Voda, 700487 Iasi, Romania; peptanariu.dragos@icmpp.ro (D.P.); vasiliu.tudor@icmpp.ro (T.V.)

\* Correspondence: zaltariov.mirela@icmpp.ro

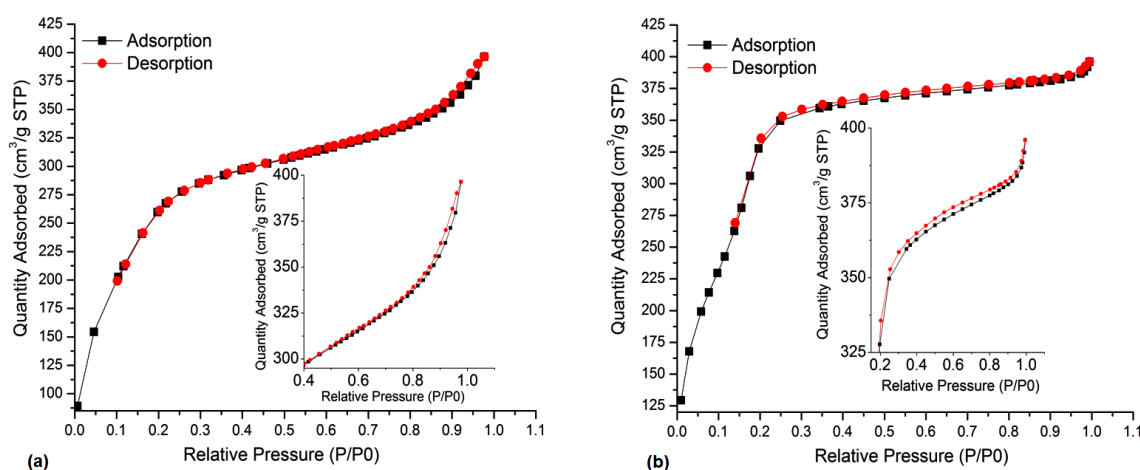

**Figure S1.** Nitrogen sorption-desorption isotherms of MSil1 (a) and MSil2 (b).

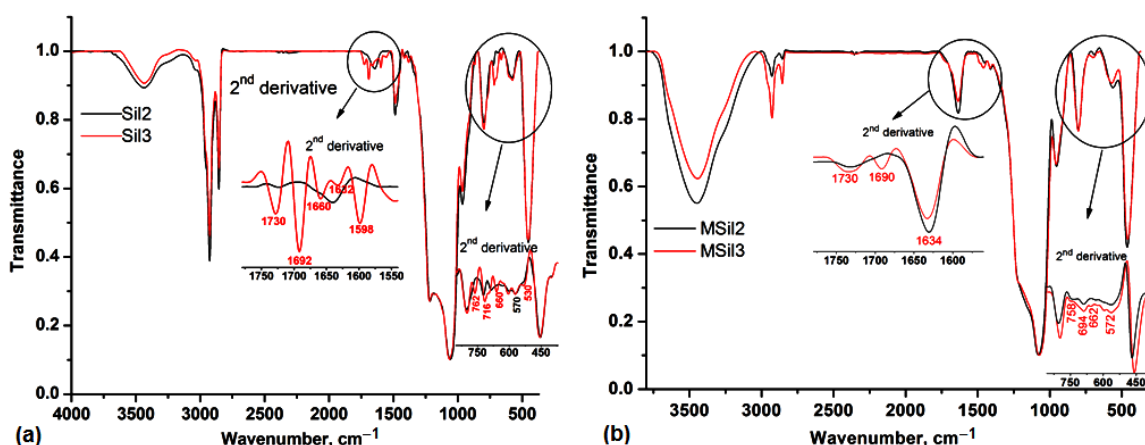

**Figure S2.** The FT-IR spectra of thiol functionalized silica: Sil2 (a) and MSil 2 (b)—black line and the glucose-modified silica: Sil3 (a) and MSil3 (b)—red line: the new bands due to glucose derivative and thioether are marked by 2nd derivative of the spectra in the 1750–1550  $\text{cm}^{-1}$  and 800–400  $\text{cm}^{-1}$ .

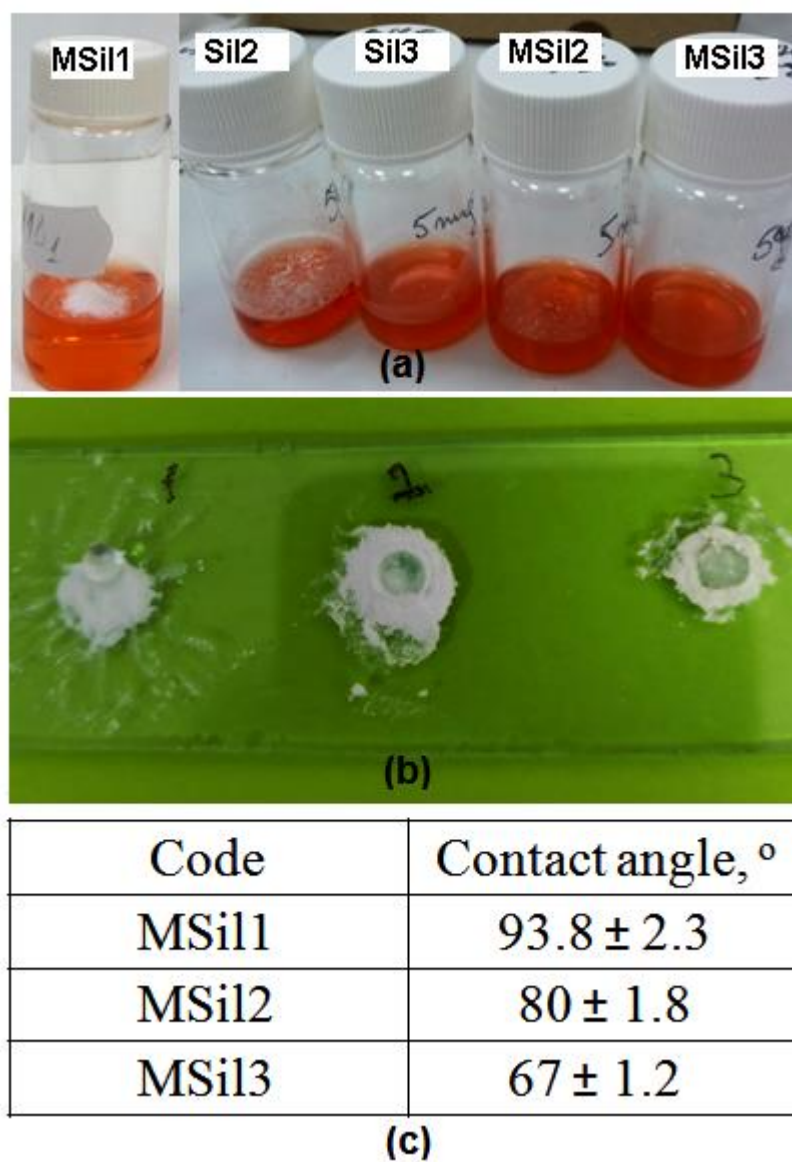

**Figure S3.** Aspect of the silica powders at contact with an aqueous solution of doxorubicin hydrochloride (a), water drops placed on mesoporous silica MSil1-3 (b) and the water contact angles estimated from pictures of water droplets (c).

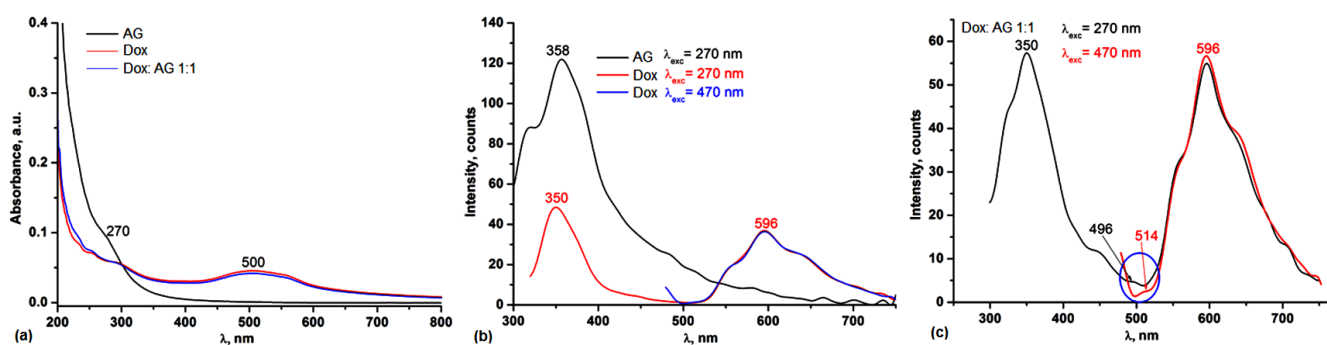

**Figure S4.** Absorption (a) and emission (b,c) spectra of AG, Dox and Dox:AG mixture 1:1.

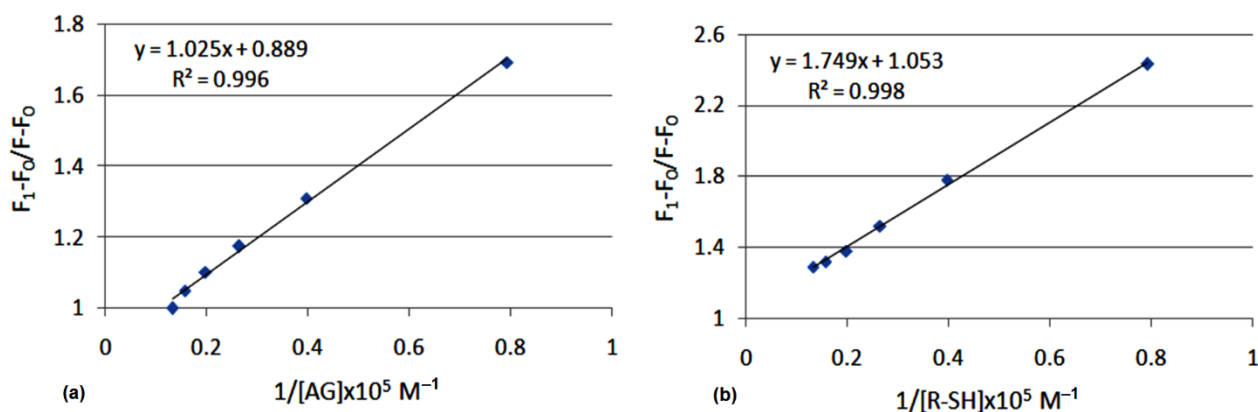

**Figure S5.** Benesi-Hildebrand plots for Dox: AG (a) and Dox: R-SH (b) complex formation, based on the fluorescence data (Figure 4).

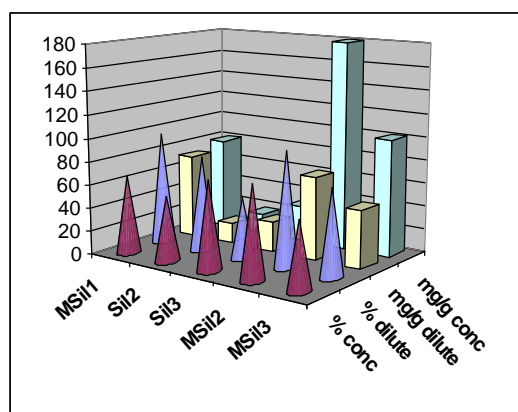

**Figure S6.** Maximum release at pH 5 from samples loaded in dilute and concentrated initial solution, expressed as % Dox released and amount of Dox released reported to silica.

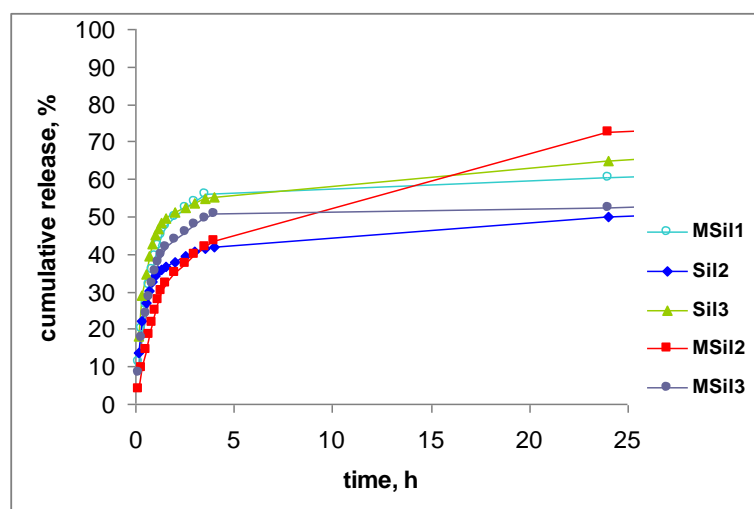

**Figure S7.** Dox release at pH = 5 (encapsulated at pH = 7.4 from 0.2% solution).

**Table S1.** Kinetics of Dox Release at pH= 5 from concentrated solution.

| Sample | Higuchi                              |                            | Korsmeyer–Peppas |        |
|--------|--------------------------------------|----------------------------|------------------|--------|
|        | $K_H$                                | $R^2$                      | $n$              | $R^2$  |
| MD1    | 29.71<br>(44.05; 13.48) <sup>a</sup> | 0.9177<br>(0.9942; 0.9994) | 0.503            | 0.9338 |
| Sil2   | 14.92<br>(27.09; 7.27)               | 0.8209<br>(0.9265; 0.987)  | 0.309            | 0.8717 |
| Sil84  | 20.02<br>(36.98; 7.67)               | 0.8212<br>(0.9541; 0.9868) | 0.313            | 0.8815 |
| MSil2  | 14.55<br>(35.07; 10.69) <sup>b</sup> | 0.8781<br>(0.9995; 0.9942) | 0.548            | 0.8681 |
| MSil84 | 26.45<br>(40.67; 11.67)              | 0.8982<br>(0.9851; 0.9993) | 0.537            | 0.899  |

<sup>a</sup> Two successive steps, before and after 90 min. <sup>b</sup> Kinetic data for 24h.

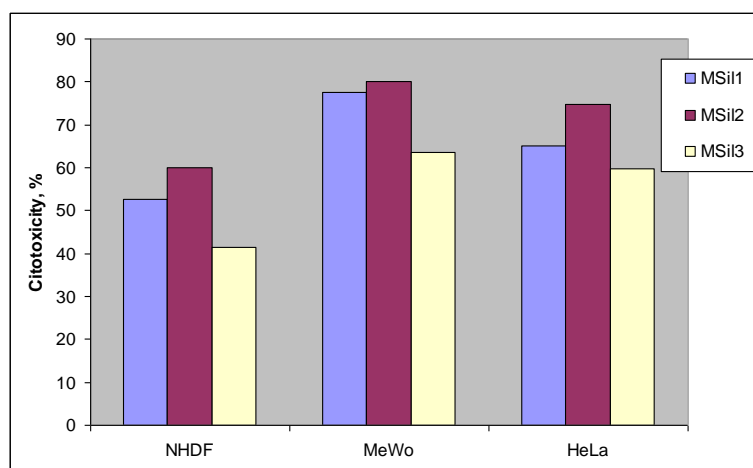**Figure S8.** The net cytotoxic action of Dox, calculated as difference in cell viability in presence of Dox-free and Dox-loaded silica.
